# Supplementary figures and images for: PROSPECTIV—a pilot trial of a nurse-led psychoeducational intervention delivered in primary care to prostate cancer survivors: study protocol for a randomised controlled trial
Source: HighWire-hosted journal article supplement (doi:10.1136/bmjopen-2014-005186), 2014-05-01

## APPENDIX 1 – STUDY OVERVIEW

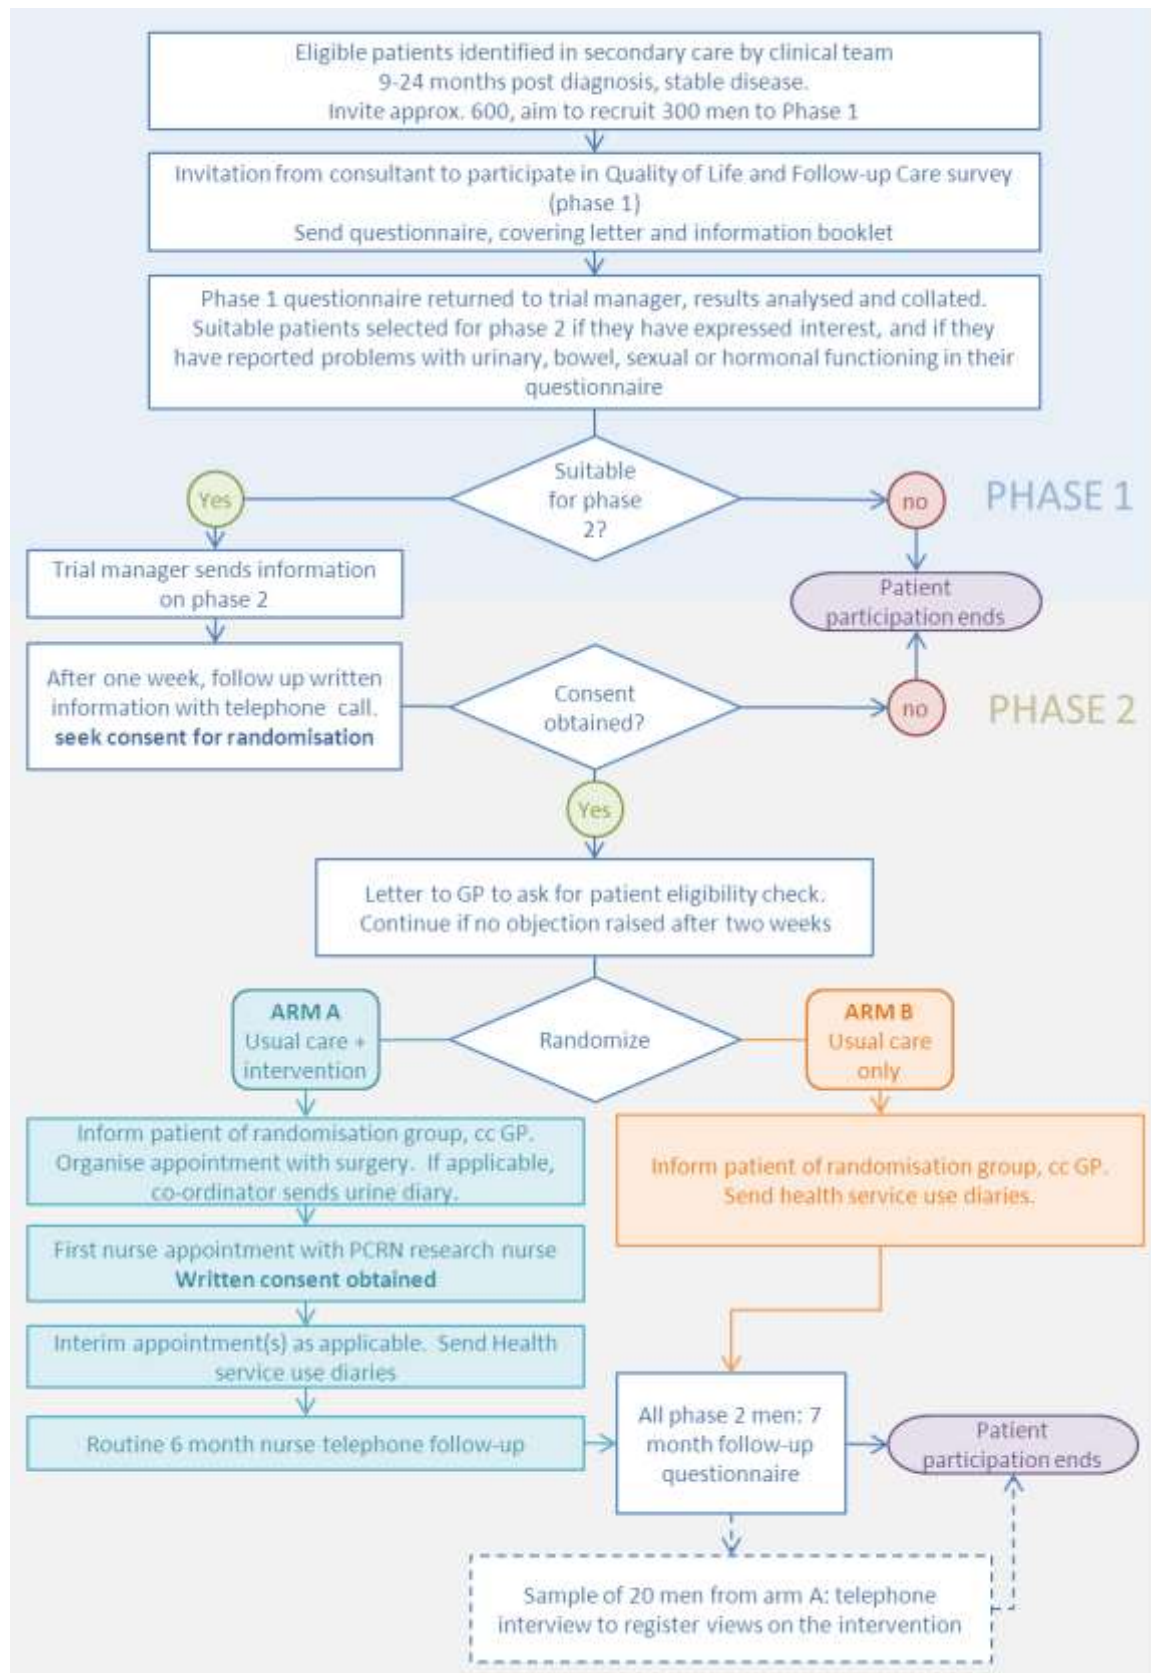

Supplement: bmjopen-2014-005186supp.pdf [file bmjopen-2014-005186supp.pdf]
